# Supplementary material for: Selenadiazole derivatives as theranostic agents for simultaneous cancer chemo-/radiotherapy by targeting thioredoxin reductase
Source: Royal Society of Chemistry journal article supplement (doi:10.1039/c5tb01501d), 2015-01-01
Supplement: c5tb01501d1.pdf [file c5tb01501d1.pdf]

## **Supporting information**

for

### **Selenadiazole Derivatives as Theranostic Agents for Simultaneous Cancer Chemo-/Radiotherapy by Targeting Thioredoxin Reductase**

Lizhen He, Shengbin Ji, Haoqiang Lai, Tianfeng Chen\*

## **Methods**

### **Examination the distribution of SeD-3 in HeLa cells.**

HeLa cells were incubated with SeD-3 at 15  $\mu$ M for 4 h and 12 h, respectively. Then we separated the nucleus of these treated HeLa cells by nuclei isolation kit: nuclei PURE prep assay kit (NUC201). These collected fractions of nucleus and cytoplasm were then conducted with fluorescence determination.

## Results

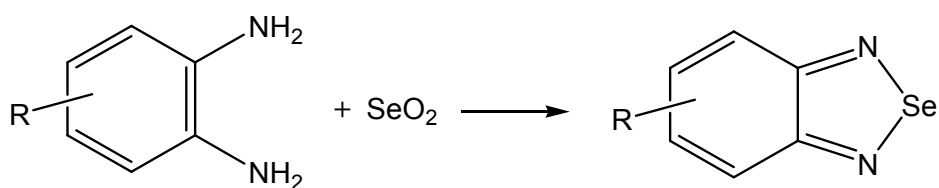

1. R= H; 2. R=  $\text{CH}_3$ ; 3. R=  $\text{NO}_2$ ;

**Scheme S1.** Chemical structure of the synthetic selenadiazole derivatives (**1-3**).

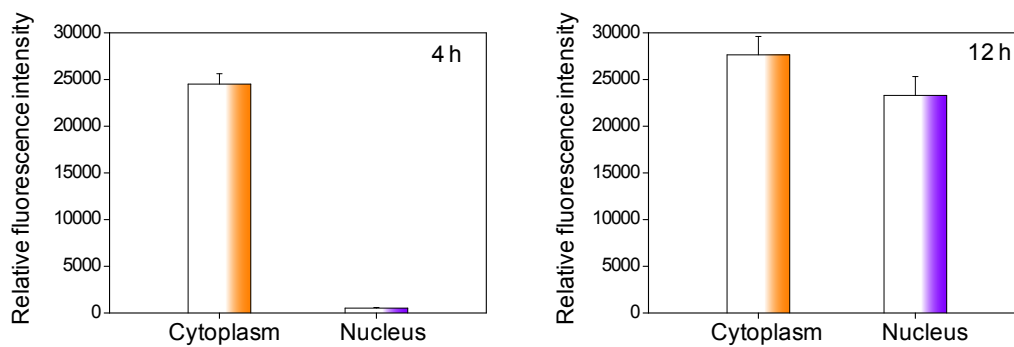

**Figure S1.** Relative fluorescence intensity of SeD-3 in the cytoplasm and nucleus of HeLa cells after 4-h or 12-h incubation.

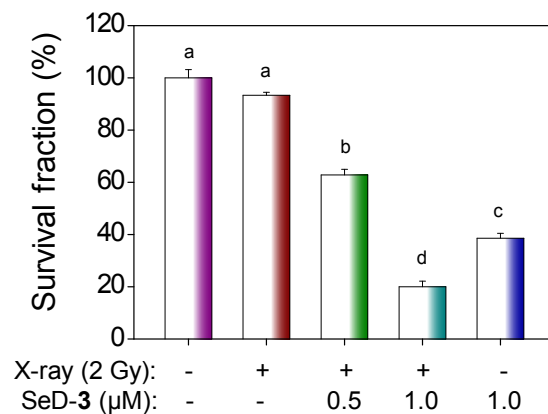

**Figure S2.** SeD-3 enhances the inhibitory effects of X-ray on the colony survival

fraction of HeLa cells. The cells were pre-treated with SeD-3 for 4 h, and then

exposed to 2 Gy X-ray, and incubated for another 24 h.

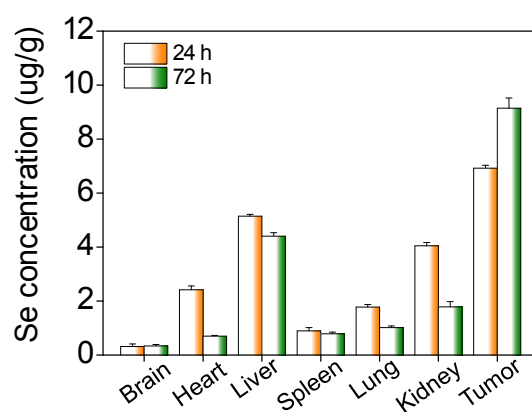

**Figure S3.** Biodistribution of Se in the main organs after 24-h and 72-h intravenous

injection to the HeLa xenografts nude mice.

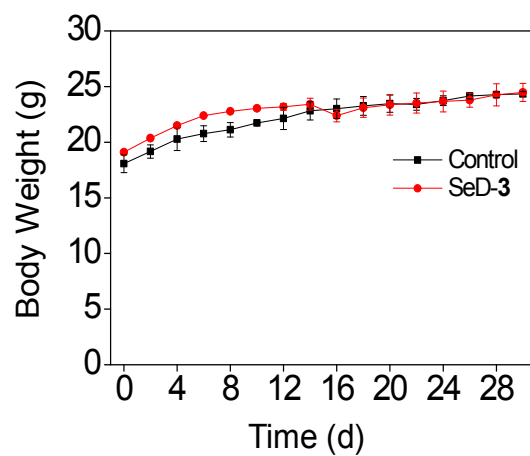

**Figure S4.** Changes of body weight after treated with SeD-3 at 2 mg/kg for 30 days.

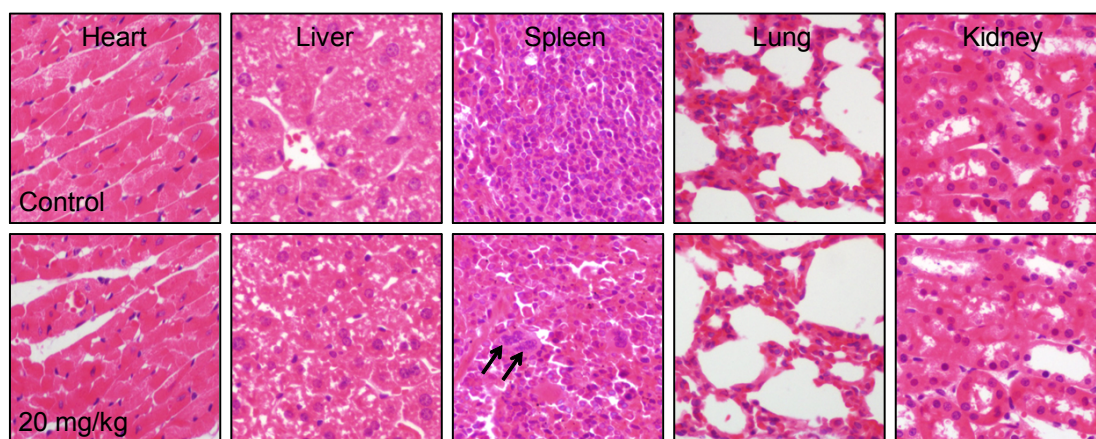

**Figure S5.** Histological analysis of the effects of SeD-3 on main organs of mice.

H&E staining of heart, liver, spleen, lung and kidney that treated by SeD-3 for 30 days at the high dose of 20 mg/kg (the concentration of selenium, n=8).
